# Supplementary material for: Tailoring the subshell and electronic structure of an atomically precise AuAg alloy nanocluster
Source: Royal Society of Chemistry journal article supplement (doi:10.1039/d3cc04432g), 2023-12-29
Supplement: d3cc04432g1.pdf [file d3cc04432g1.pdf]

Supporting Information for

## **Tailoring the Subshell and Electronic Structure of Atomically Precise AuAg Alloy Nanocluster**

Guocheng Deng,<sup>a,b,⊥</sup> Taeyoung Ki,<sup>a,b,⊥</sup> Xiaolin Liu,<sup>a,b,⊥</sup> Yuping Chen,<sup>c,⊥</sup> Kangjae Lee,<sup>a,b</sup> Seungwoo Yoo,<sup>a,b</sup> Qing Tang,<sup>c,\*</sup> Megalamane S. Bootharaju,<sup>a,b,\*</sup> and Taeghwan Hyeon<sup>a,b,\*</sup>

<sup>a</sup>*Center for Nanoparticle Research, Institute for Basic Science (IBS), Seoul 08826, Republic of Korea.*

<sup>b</sup>*School of Chemical and Biological Engineering, and Institute of Chemical Processes, Seoul National University, Seoul 08826, Republic of Korea.*

<sup>c</sup>*School of Chemistry and Chemical Engineering, Chongqing Key Laboratory of Theoretical and Computational Chemistry, Chongqing University, Chongqing 401331, China.*

\*Email: qingtang@cqu.edu.cn, msbootharaju@snu.ac.kr, thyeon@snu.ac.kr

<sup>⊥</sup>G.D., T.K., X.L., and Y.C. contributed equally to this work.

## EXPERIMENTAL SECTION

**Reagents.** Hydrogen tetrachloroaurate(III) trihydrate ( $\text{HAuCl}_4 \cdot 3\text{H}_2\text{O}$ ) was purchased from Strem. Triethylamine ( $\text{Et}_3\text{N}$ ), silver nitrate ( $\text{AgNO}_3$ ), silver acetate ( $\text{CH}_3\text{COOAg}$ ), sodium methoxide ( $\text{CH}_3\text{ONa}$ ), trans-2-[3-(4-tert-butylphenyl)-2-methyl-2-propenylidene]malononitrile (DCTB), and tetraphenylphosphonium tetraphenylborate ( $\text{PPh}_4\text{BPh}_4$ ) were purchased from Sigma-Aldrich. 3,4-difluorophenylacetylene ( $\text{HC}\equiv\text{CR}$ ), phenylacetylene ( $\text{HC}\equiv\text{CPh}$ ), dimethyl sulfide ( $(\text{CH}_3)_2\text{S}$ ) and borane *tert*-butylamine complex ( $\text{BH}_3 \cdot \text{C}_4\text{H}_{11}\text{N}$ ) were purchased from TCI. Dichloromethane ( $\text{CH}_2\text{Cl}_2$ ), methanol ( $\text{CH}_4\text{O}$ ), acetonitrile ( $\text{CH}_3\text{CN}$ ), acetone ( $\text{CH}_3\text{COCH}_3$ ) and *n*-hexane ( $\text{C}_6\text{H}_{14}$ ) were purchased from Samchun.  $\text{AuSMe}_2\text{Cl}^1$  and  $\text{Au}_{34}\text{Ag}_{28}(\text{C}\equiv\text{CPh})_{34}^2$  were prepared according to literature method. The water used in all experiments was ultrapure. All reagents were used as received without further purification.

**Synthesis of  $\text{AgC}\equiv\text{CR}$ :** 340 mg of  $\text{AgNO}_3$  was dissolved in 20 mL of acetonitrile, followed by the subsequent addition of 242  $\mu\text{L}$  of 3,4-difluorophenylacetylene. Then, 400  $\mu\text{L}$  of triethylamine was added to the solution with vigorous stirring. The reaction mixture was left to stir for 4 hours at room temperature in the absence of light. Afterward, the obtained turbid mixture was centrifuged at 8000 rpm for 1 min. The precipitate was washed with 30 mL of methanol and then dried in vacuum at room temperature to give a gray  $\text{AgC}\equiv\text{CR}$  complex. The yield of the complex was ~81% (based on Ag).

**Synthesis of  $\text{AuC}\equiv\text{CR}$ :** 591 mg of  $\text{AuSMe}_2\text{Cl}$  was dispersed in 30 mL of acetone, to which 242  $\mu\text{L}$  of 3,4-difluorophenylacetylene was added subsequently. Then, 300  $\mu\text{L}$  of triethylamine was added to the above solution under vigorous stirring. The reaction mixture was stirred for 1 hour at room temperature in absence of light. The solution was then subjected to evaporation until dryness, resulting in the formation of a yellow solid. This solid was subsequently washed with 30 mL of water and 15 mL of methanol. Then the yellow solid was dried in vacuum at room temperature to give a yellow  $\text{AuC}\equiv\text{CR}$  complex in a yield of ~83% (based on Au).

**Synthesis of  $\text{Au}_{34}\text{Ag}_{27}$  nanocluster:** The synthesis of  $\text{Au}_{34}\text{Ag}_{27}$  was carried in a small vial at 25 °C in ambient air. Specifically, 6.7 mg of  $\text{AuC}\equiv\text{CR}$  and 4.9 mg of  $\text{AgC}\equiv\text{CR}$  were dispersed in a mixed solution of  $\text{CH}_2\text{Cl}_2$  (3 mL) and  $\text{CH}_3\text{OH}$  (1 mL). Subsequently, 1 mg of  $\text{PPh}_4\text{BPh}_4$  solid was added to the above solution while maintaining vigorous stirring (600 rpm). After stirring for 5 minutes, a solution of 3 mg of borane *tert*-butylamine complex in 1 mL of  $\text{CH}_2\text{Cl}_2$  was added dropwise. This led to the dissolution of the suspension and a gradual change in the solution's color to red and then brown. The solution was left to age for 18 hours. The resulting solution was washed once with water by adding 5 mL of water and shaking for 1 minute. The aqueous phase was removed, and the organic phase was centrifuged at 12,000 rpm for 5 minutes. The precipitate was discarded, and the organic solution (2 mL) underwent vapor diffusion of *n*-hexane (15 mL) at 25 °C. After 7 days, black block crystals were obtained with a yield ranging from 4-6% (based on Au).

**Physical measurements:** The UV/vis absorption spectra were recorded using a Cary 5000 spectrophotometer (Agilent). The scanning electron microscopy energy dispersive X-ray spectroscopy (SEM-EDS) analysis was performed on a JSM-7800F Prime microscope (JEOL, Japan). Matrix-assisted laser desorption ionization-time of flight-mass spectrometry (MALDI-TOF-MS) of the nanoclusters was performed using AB SCIEX TOF/TOFTM5800 mass spectrometer (AB Sciex, MA, USA) installed at the Korea Basic Science Institute (KBSI), Seoul center.

**Single crystal structure analysis.** The diffraction data of  $\text{Au}_{34}\text{Ag}_{27}$  were collected by X-ray single crystal diffractometer with Cu  $K\alpha$  radiation ( $\lambda = 1.54184 \text{ \AA}$ ) at 100 K on a Rigaku XtaLab Synergy R system. The data were processed using CrysAlis<sup>Pro</sup>.<sup>3</sup> The structure was solved and refined using Full-matrix least-squares based on  $F^2$  with program ShelXT and ShelXL within Olex2.<sup>4,6</sup> SQUEEZE tool of PLATON was applied, due to large solvent (*n*-hexane and DCM) voids in the structure. A solvent mask was calculated and 726 electrons were found in a volume of  $2791 \text{ \AA}^3$  in six voids per unit cell. This is consistent with the presence of ten  $\text{CH}_2\text{Cl}_2$  and six  $\text{C}_6\text{H}_{14}$ , per asymmetric unit which account for 720 electrons per unit cell. More refined data are provided in Table S1.

**Computational details.** To simplify the calculation, all  $\text{C} \equiv \text{C-R}$  ( $\text{HC} \equiv \text{CR}$  is 3,4-difluorophenylacetylene) ligands are replaced with  $\text{C} \equiv \text{C-CH}_3$  groups. As for optical-absorption spectrum and orbital information, the density functional theory (DFT) calculations were performed by employing the CP2K package.<sup>7</sup> The electronic structure calculations are described by DFT with the spin-polarized Perdew–Burke–Ernzerhof (PBE) functional and mixed double- $\zeta$  Gaussian and plane-wave (GPW) basis sets with an energy cutoff of 350 Ry.<sup>8</sup> Core electrons have been modeled by Goedecker–Teter–Hutter (GTH) pseudopotentials with 11, 11, 4 and 1 valence electrons for Au, Ag, C and H, respectively. The DFT-D3 method proposed by Grimme et al. was adopted to better describe the noncovalent interactions.<sup>9,10</sup> Then, the time-dependent DFT (TDDFT) computation of optical absorption spectrum was performed at the PBE level with the DZVP-MOLOPT-SR-GTH basis sets. Based on the above results, the Multiwfn program can be used to process and plot UV-Vis spectrum.<sup>11</sup>

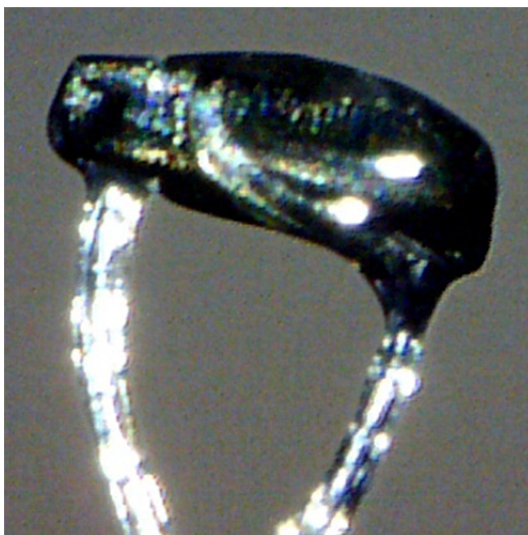

**Figure S1.** A photograph of the single crystal of the  $\text{Au}_{34}\text{Ag}_{27}$  nanocluster.

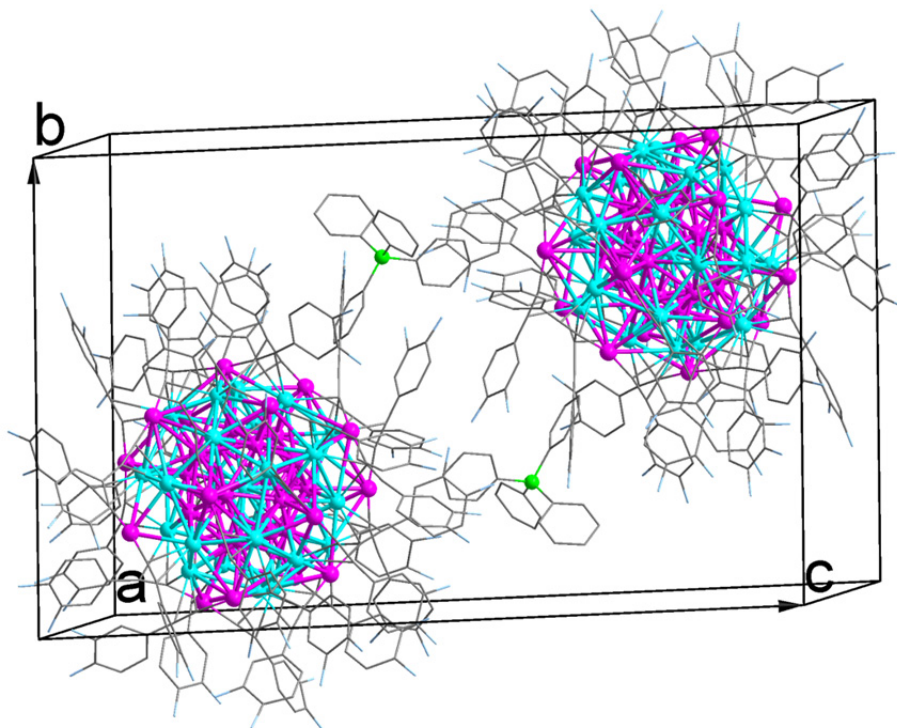

**Figure S2.** The packing diagram of  $\text{Au}_{34}\text{Ag}_{27}$ . Color legend: magenta, Au; turquoise, Ag; green, P; pale blue, F; gray, C. All hydrogen atoms are omitted for clarity.

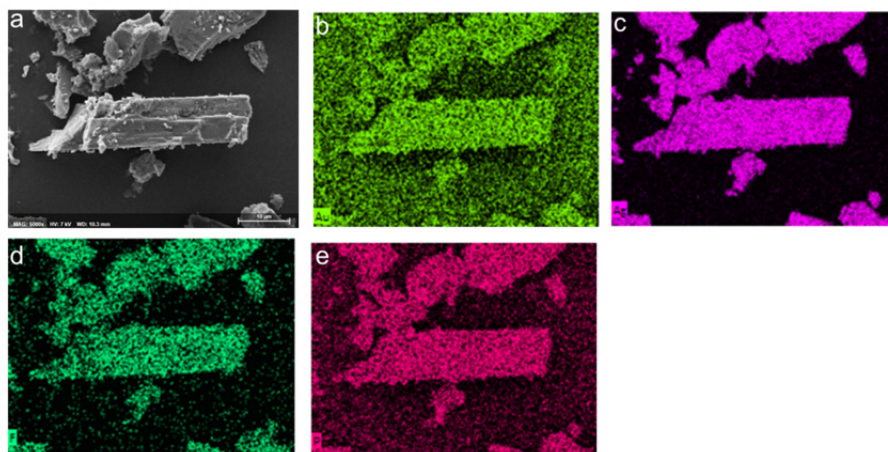

**Figure S3.** (a) SEM image of a crystal of  $\text{Au}_{34}\text{Ag}_{27}$ . (b-e) EDS mapping images of Au, Ag, F and P, respectively, of the  $\text{Au}_{34}\text{Ag}_{27}$  crystals. The background signal in the elemental map b is originated from Pt, which was coated to avoid sample charging during SEM-EDS measurement.

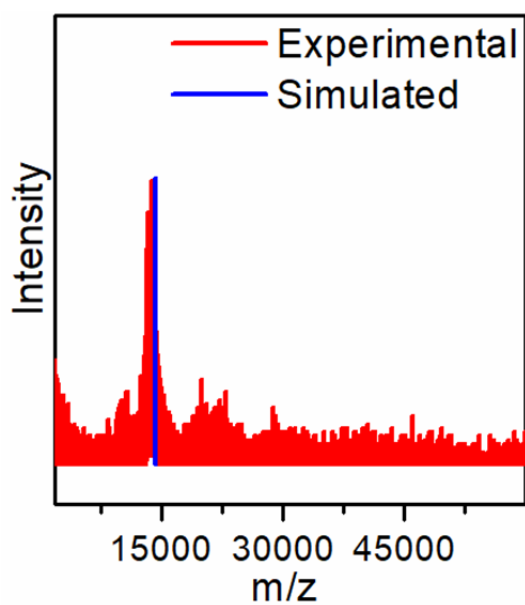

**Figure S4.** Experimental and Simulated mass spectra of  $\text{Au}_{34}\text{Ag}_{27}$ .

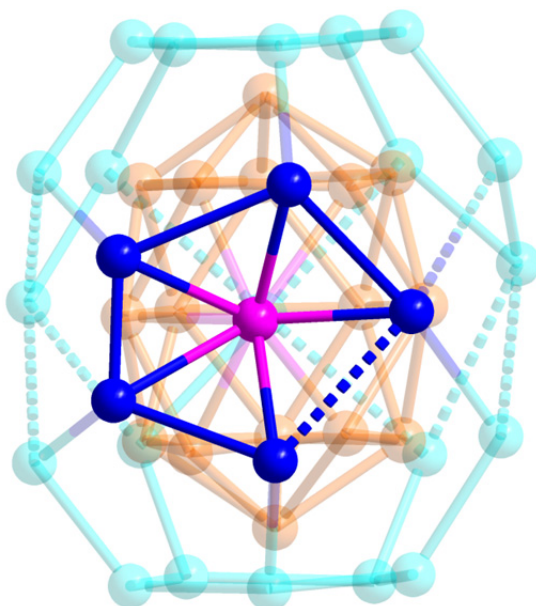

**Figure S5.** Each of the faces of the third shell of  $\text{Au}_{34}\text{Ag}_{27}$  covers a gold atom from the second shell. Color legend: orange and magenta, Au; turquoise and blue, Ag.

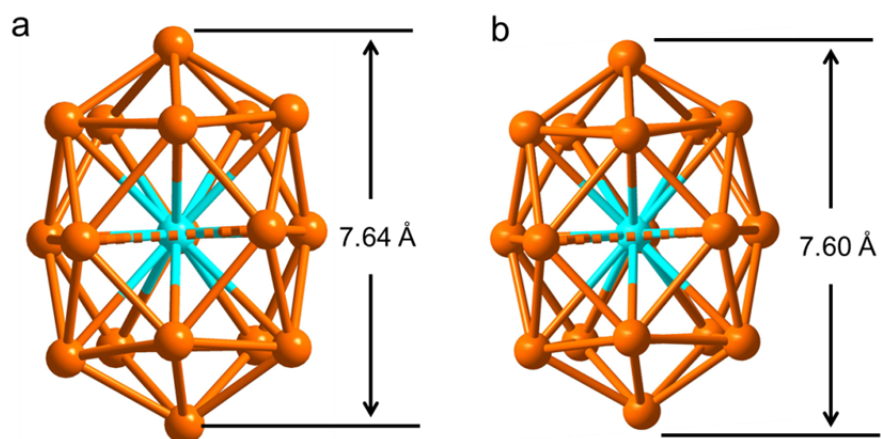

**Figure S6.** Structural comparison of the first and second shells ( $\text{Ag}_1@Au_{17}$ ) of  $\text{Au}_{34}\text{Ag}_{27}$  (a) and  $\text{Au}_{34}\text{Ag}_{28}$  (b) nanoclusters. Color legend: orange, Au; turquoise, Ag.

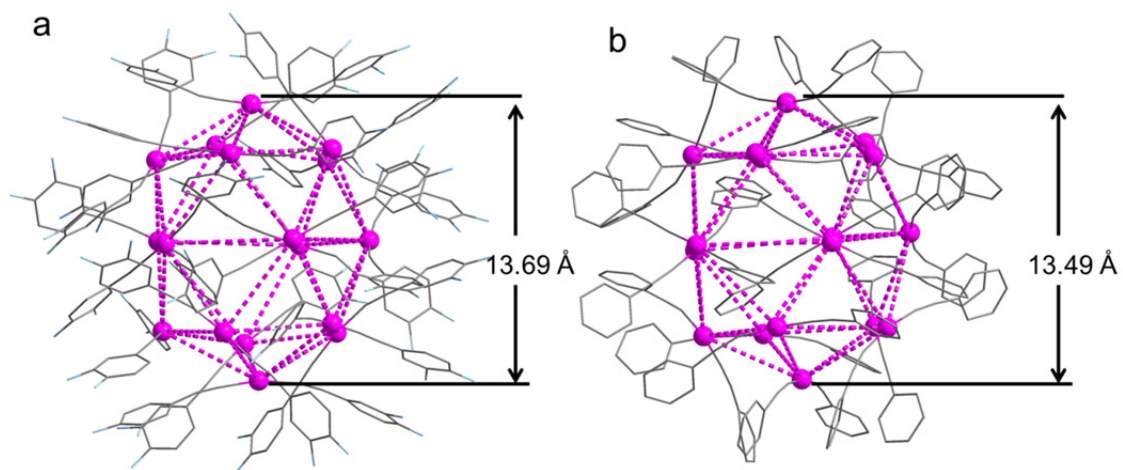

**Figure S7.** Structural comparison of the fourth shell ( $\text{Au}_{17}$ ) of  $\text{Au}_{34}\text{Ag}_{27}$  (a) and  $\text{Au}_{34}\text{Ag}_{28}$  (b) nanoclusters.

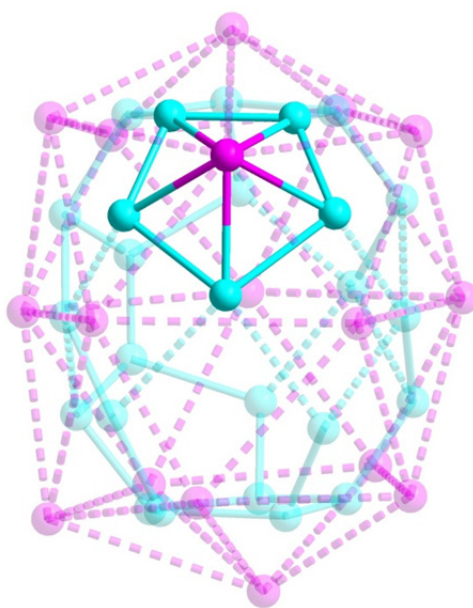

**Figure S8.** Each gold atom of the fourth shell of  $\text{Au}_{34}\text{Ag}_{27}$  caps one face of the third shell. Color legend: magenta, Au; turquoise, Ag.

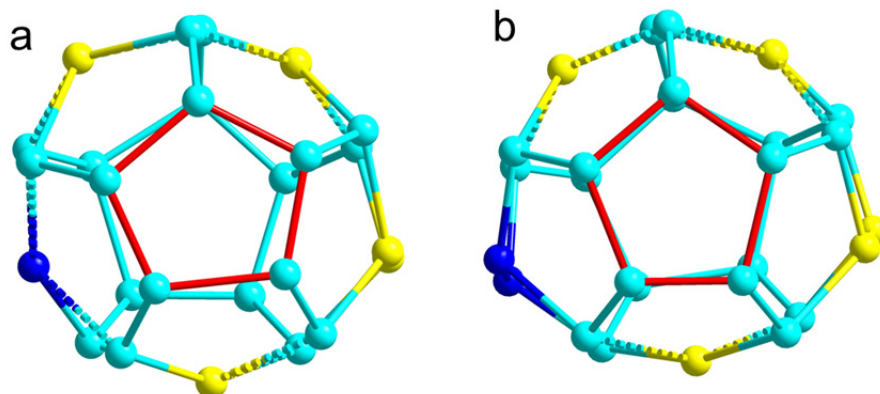

**Figure S9.** Top view of the third shell of the  $\text{Au}_{34}\text{Ag}_{27}$  (a) and  $\text{Au}_{34}\text{Ag}_{28}$  (b) nanoclusters. Color legend: turquoise, blue, and yellow, Ag.



**Table S1.** The crystal data and structure refinement for the **Au<sub>34</sub>Ag<sub>27</sub>** nanocluster.

---

|                                                              |                                                                                       |
|--------------------------------------------------------------|---------------------------------------------------------------------------------------|
| Identification code                                          | <b>Au<sub>34</sub>Ag<sub>27</sub></b>                                                 |
| Empirical formula                                            | C <sub>296</sub> H <sub>122</sub> Ag <sub>27</sub> Au <sub>34</sub> F <sub>68</sub> P |
| Formula weight                                               | 14610.25                                                                              |
| Temperature/K                                                | 100(2)                                                                                |
| Crystal system                                               | triclinic                                                                             |
| Space group                                                  | <i>P</i> -1                                                                           |
| <i>a</i> /Å                                                  | 21.0215(2)                                                                            |
| <i>b</i> /Å                                                  | 22.1806(2)                                                                            |
| <i>c</i> /Å                                                  | 35.4832(3)                                                                            |
| $\alpha$ /°                                                  | 88.1010(2)                                                                            |
| $\beta$ /°                                                   | 74.9280(3)                                                                            |
| $\gamma$ /°                                                  | 87.3240(2)                                                                            |
| Volume/Å <sup>3</sup>                                        | 15945.4(3)                                                                            |
| <i>Z</i>                                                     | 2                                                                                     |
| $\rho_{\text{calc}}$ /cm <sup>3</sup>                        | 3.041                                                                                 |
| $\mu$ /mm <sup>-1</sup>                                      | 42.251                                                                                |
| F(000)                                                       | 12960.0                                                                               |
| Crystal size/mm <sup>3</sup>                                 | 0.532 × 0.187 × 0.152                                                                 |
| Radiation                                                    | Cu K $\alpha$ ( $\lambda$ = 1.54184)                                                  |
| 2 $\Theta$ range for data collection/°                       | 5.824 to 133.196                                                                      |
| Index ranges                                                 | -25 ≤ <i>h</i> ≤ 16, -26 ≤ <i>k</i> ≤ 26, -42 ≤ <i>l</i> ≤ 42                         |
| Reflections collected                                        | 156980                                                                                |
| Independent reflections                                      | 55473 [ <i>R</i> <sub>int</sub> = 0.1144, <i>R</i> <sub>sigma</sub> = 0.1066]         |
| Data/restraints/parameters                                   | 55473/2578/3151                                                                       |
| Goodness-of-fit on F <sup>2</sup>                            | 1.120                                                                                 |
| Final <i>R</i> indexes [ <i>I</i> ≥ 2 $\sigma$ ( <i>I</i> )] | <i>R</i> <sub>1</sub> = 0.1081, <i>wR</i> <sub>2</sub> = 0.2649                       |
| Final <i>R</i> indexes [all data]                            | <i>R</i> <sub>1</sub> = 0.1213, <i>wR</i> <sub>2</sub> = 0.2746                       |
| Largest diff. peak/hole / e Å <sup>-3</sup>                  | 7.73/-6.18                                                                            |

---

## References

- 1) N. Nishina and Y. Yamamoto, *Synlett*. 2007, **11**, 1767-1770.
- 2) Y. Wang, X. Wan, L. Ren, H. Su, G. Li, S. Malola, S. Lin, Z. Tang, H. Häkkinen, B. K. Teo, Q. Wang and N. Zheng, *J. Am. Chem. Soc.* 2016, **138**, 3278-3281.
- 3) *CrysAlisPro*, version 1.171.135.119; Agilent Technologies Inc.: Santa Clara, CA, 2011.
- 4) O. V. Dolomanov, L. J. Bourhis, R. J. Gildea, J. A. K. Howard and H. Puschmann, *J. Appl. Crystallogr.* 2009, **42**, 339-341.
- 5) G. M. Sheldrick, *Acta Crystallogr. Sect. A: Found. Crystallogr.* 2008, **64**, 112-122.
- 6) G. M. Sheldrick, *Acta Crystallogr. Sect. A: Found. Adv.* 2015, **A71**, 3-8.
- 7) J. VandeVondele, M. Krack, F. Mohamed, M. Parrinello, T. Chassaing and J. Hutter, *Comput. Phys. Commun.* 2005, **167**, 103–128.
- 8) J. P. Perdew, K. Burke and M. Ernzerhof, *Phys. Rev. Lett.* 1996, **77**, 3865–3868.
- 9) S. Grimme, J. Antony, S. Ehrlich and H. Krieg, *J. Chem. Phys.* 2010, **132**, 154104.
- 10) S. Grimme, S. Ehrlich and L. Goerigk, *J. Comput. Chem.* 2011, **32**, 1456–1465.
- 11) T. Lu and F. Chen, *J. Comput. Chem.* 2012, **33**, 580-592.
